# Supplementary material for: Phylogenetic Analysis of a Microbialite-Forming Microbial Mat from a Hypersaline Lake of the Kiritimati Atoll, Central Pacific
Source: PLoS One. 2013 Jun 10;8(6):e66662. doi: 10.1371/journal.pone.0066662 (PMC3677903; doi:10.1371/journal.pone.0066662)
Supplement: Figure S4 — Relative abundances of rare archaeal phylogenetic groups. (PDF) [file pone.0066662.s004.pdf]

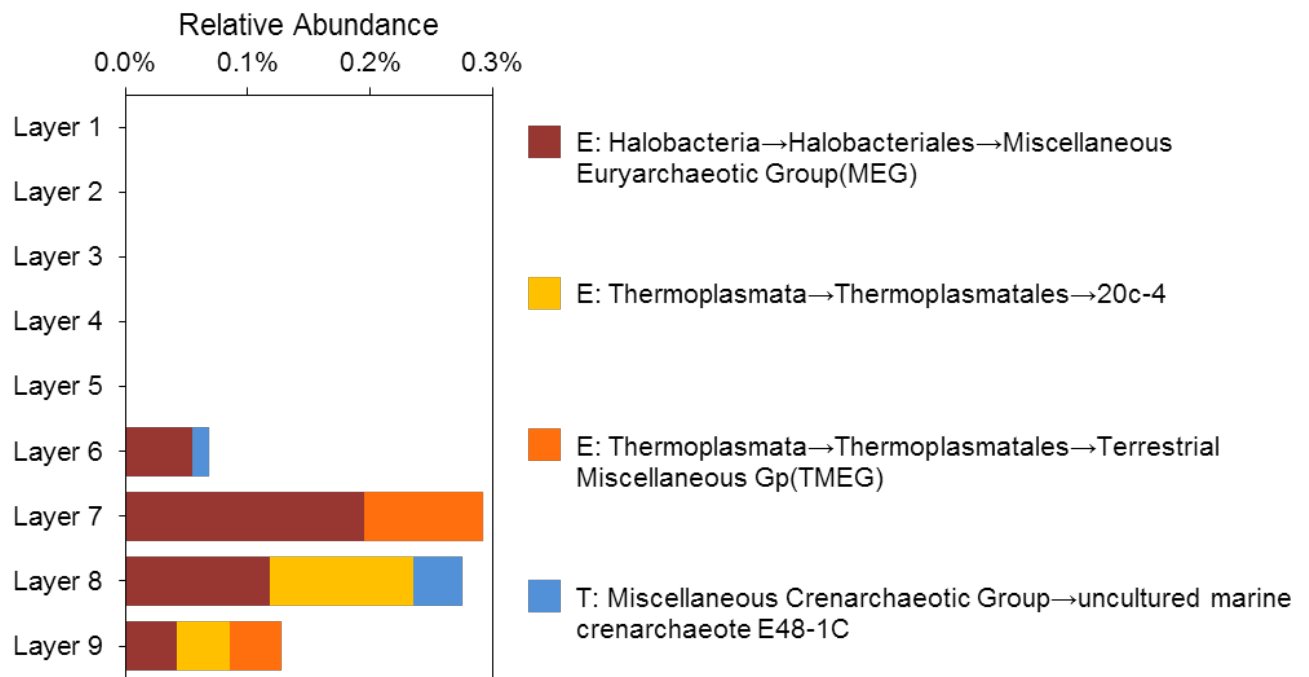

**Figure S4. Relative abundances of rare archaeal phylogenetic groups.** The artificial group "Other" (Figure 7) includes rare (<0.5%) archaeal lineages and candidate divisions. Abbreviations: E, *Euryarchaeota*; T, *Thaumarchaeota*.
