# Supplementary material for: Phylogenetic Analysis of a Microbialite-Forming Microbial Mat from a Hypersaline Lake of the Kiritimati Atoll, Central Pacific
Source: PubMed Central journal article supplement (PMC3677903; doi:10.1371/journal.pone.0066662), 2013-06-10
Supplement: pone.0066662.s003.pdf [file pone.0066662.s003.pdf]

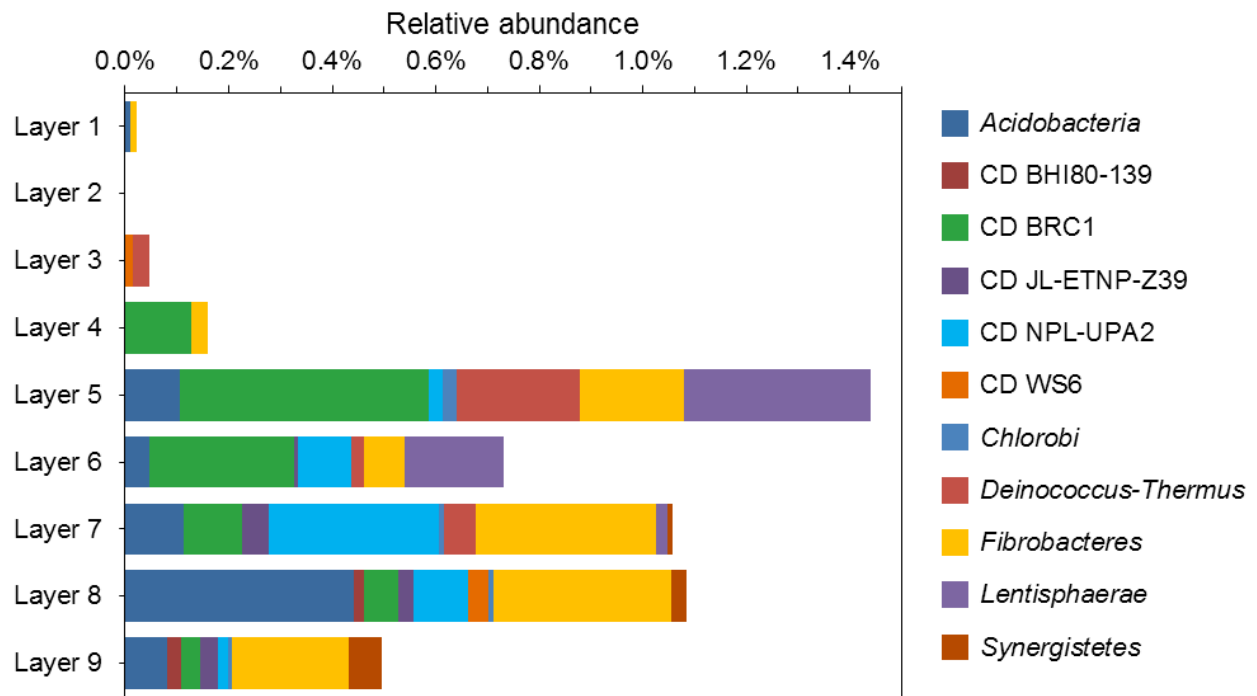

**Figure S3. Relative abundances of rare bacterial phylogenetic groups.** The artificial group "Other" (Figure 6) includes rare (<0.5%) bacterial phyla and candidate divisions (CD).
