# Supplementary material for: Phylogenetic Analysis of a Microbialite-Forming Microbial Mat from a Hypersaline Lake of the Kiritimati Atoll, Central Pacific
Source: PubMed Central journal article supplement (PMC3677903; doi:10.1371/journal.pone.0066662), 2013-06-10
Supplement: pone.0066662.s005.pdf [file pone.0066662.s005.pdf]

**Table S1.** Hydrochemical data of sea water and Lake 21 waters, Kiritimati atoll.

| Sample                                 | Sampling depth [m] | Date             | T [°C]                                      | EC 25°C (mS cm <sup>-1</sup> ) | Salinity (‰)                              | Eh (mV)                            | pH                                      |                                   |                           |
|----------------------------------------|--------------------|------------------|---------------------------------------------|--------------------------------|-------------------------------------------|------------------------------------|-----------------------------------------|-----------------------------------|---------------------------|
| Seawater (Captain Cook Hotel)          | 0.1                | 19.03.2011       | 28.4                                        | 53.0                           | 34.7                                      | n.d.                               | 8.36                                    |                                   |                           |
| Lake 21 (SE-side 4 m from shore)       | 0.1                | 13.03.2011       | 31.7                                        | 189.8                          | 171.8                                     | 91                                 | 7.95                                    |                                   |                           |
| Lake 21 (seepage-affected lake bottom) | 1.0                | 15.03.2011       | 28.7                                        | 124.8                          | 94.4                                      | n.d.                               | 8.03                                    |                                   |                           |
| Lake 21 (surface, 2002)                | 0.1                | 04.09.2002       | 32.5                                        | 140.1                          | 112.9                                     | 263                                | 8.37                                    |                                   |                           |
| Sample                                 | O <sub>2</sub>     | Ca <sup>2+</sup> | Mg <sup>2+</sup>                            | Na <sup>+</sup>                | K <sup>+</sup><br>(mmol L <sup>-1</sup> ) | Sr <sup>2+</sup>                   | Cl <sup>-</sup>                         | SO <sub>4</sub> <sup>2-</sup>     | TA<br>meq L <sup>-1</sup> |
| Seawater (Captain Cook Hotel)          | 0.198              | 10.4             | 54                                          | 474                            | 10.3                                      | 0.093                              | 552                                     | 28.6                              | 2.31                      |
| Lake 21 (SE-side 4 m from shore)       | 0.079              | 29.3             | 299                                         | 2633                           | 57.1                                      | 0.426                              | 3054                                    | 143.3                             | 4.84                      |
| Lake 21 (seepage-affected lake bottom) | n.d.               | 19.1             | 155                                         | 1363                           | 29.7                                      | 0.232                              | 1588                                    | 74.7                              | 3.44                      |
| Lake 21 (surface, 2002)                | n.d.               | 38.0             | 197                                         | 1643                           | 34.7                                      | 0.312                              | 1841                                    | 113.6                             | 4.24                      |
| Sample                                 | Si                 | Fe               | NH <sup>4+</sup><br>(μmol L <sup>-1</sup> ) | PO <sub>4</sub> <sup>3-</sup>  | PCO <sub>2</sub><br>(μatm)                | SI <sub>Calcite</sub> <sup>a</sup> | SI <sub>Aragonite</sub><br>(log IAP/KT) | SI <sub>Gypsum</sub> <sup>a</sup> |                           |
| Seawater (Captain Cook Hotel)          | 3.6                | 1.10             | n.d.                                        | 0.44                           | 269                                       | 0.86                               | 0.72                                    | -0.66                             |                           |
| Lake 21 (SE-side 4 m from shore)       | 54.6               | 1.35             | 0.086                                       | 0.02                           | 871                                       | 1.26                               | 1.12                                    | 0.13                              |                           |
| Lake 21 (seepage-affected lake bottom) | n.d.               | 0.23             | n.d.                                        | n.d.                           | 676                                       | 0.92                               | 0.78                                    | -0.26                             |                           |
| Lake 21 (surface, 2002)                | 31.1               | 1.97             | 2.25                                        | 0.46                           | 224                                       | 1.44                               | 1.30                                    | 0.13                              |                           |

<sup>a</sup>Saturation index  $SI_{\text{Calcite}} = \log \Omega_{\text{Calcite}} = \log [\text{ion activity product (Ca}^{2+}) \times (\text{CO}_3^{2-}) / \text{solubility product } K_{\text{calcite}}]$

n.d., not determined
