# Supplementary material for: Phylogenetic Analysis of a Microbialite-Forming Microbial Mat from a Hypersaline Lake of the Kiritimati Atoll, Central Pacific
Source: PubMed Central journal article supplement (PMC3677903; doi:10.1371/journal.pone.0066662), 2013-06-10
Supplement: pone.0066662.s006.pdf [file pone.0066662.s006.pdf]

**Table S2.** Data processing of 16S rRNA gene sequences.

| Sample          | No. of sequences |         |                           |                   |                  |                                 |                         |                                             |                                            |              |            |                                       |                 |
|-----------------|------------------|---------|---------------------------|-------------------|------------------|---------------------------------|-------------------------|---------------------------------------------|--------------------------------------------|--------------|------------|---------------------------------------|-----------------|
|                 | Raw              | <250 bp | With ambiguous base pairs | Quality score <25 | >8 homo-polymers | >2 mismatches in forward primer | After quality filtering | Potential chimeras (UCHIME <i>de novo</i> ) | Potential chimeras (UCHIME reference mode) | In OTU table | Singletons | Extrinsic domain and chloroplast OTUs | Final OTU table |
| <b>Bacteria</b> |                  |         |                           |                   |                  |                                 |                         |                                             |                                            |              |            |                                       |                 |
| Layer 1         | 13,523           | 2,997   | 551                       | 89                | 0                | 106                             | 9,780                   | 4                                           | 0                                          | 9,776        | 315        | 16                                    | 9,445           |
| Layer 2         | 9,965            | 2,809   | 424                       | 35                | 0                | 28                              | 6,669                   | 3                                           | 0                                          | 6,666        | 19         | 1                                     | 6,646           |
| Layer 3         | 10,604           | 3,297   | 451                       | 27                | 0                | 38                              | 6,791                   | 374                                         | 9                                          | 6,408        | 93         | 0                                     | 6,315           |
| Layer 4         | 10,418           | 3,080   | 741                       | 16                | 0                | 36                              | 6,545                   | 81                                          | 1                                          | 6,463        | 184        | 0                                     | 6,279           |
| Layer 5         | 11,200           | 2,705   | 773                       | 51                | 0                | 46                              | 7,625                   | 53                                          | 4                                          | 7,568        | 63         | 0                                     | 7,505           |
| Layer 6         | 17,981           | 4,283   | 835                       | 87                | 2                | 106                             | 12,668                  | 6                                           | 0                                          | 12,662       | 82         | 0                                     | 12,580          |
| Layer 7         | 15,064           | 4,086   | 906                       | 84                | 3                | 64                              | 9,921                   | 6                                           | 1                                          | 9,914        | 173        | 0                                     | 9,741           |
| Layer 8         | 16,653           | 4,268   | 1,195                     | 106               | 3                | 55                              | 11,026                  | 5                                           | 2                                          | 11,019       | 602        | 0                                     | 10,417          |
| Layer 9         | 17,308           | 4,697   | 948                       | 133               | 1                | 41                              | 11,488                  | 1                                           | 0                                          | 11,487       | 370        | 0                                     | 11,117          |
| <b>Archaea</b>  |                  |         |                           |                   |                  |                                 |                         |                                             |                                            |              |            |                                       |                 |
| Layer 1         | 6,867            | 998     | 458                       | 937               | 9                | 1,323                           | 3,142                   | 0                                           | 0                                          | 3,142        | 35         | 0                                     | 3,107           |
| Layer 2         | 4,980            | 710     | 149                       | 33                | 0                | 274                             | 3,814                   | 7                                           | 0                                          | 3,807        | 2          | 0                                     | 3,805           |
| Layer 3         | 4,585            | 646     | 223                       | 50                | 0                | 219                             | 3,447                   | 12                                          | 0                                          | 3,435        | 17         | 0                                     | 3,418           |
| Layer 4         | 5,101            | 607     | 334                       | 43                | 0                | 376                             | 3,741                   | 4                                           | 0                                          | 3,737        | 213        | 0                                     | 3,524           |
| Layer 5         | 22,937           | 5,088   | 711                       | 3,071             | 1                | 2,519                           | 11,547                  | 852                                         | 0                                          | 10,695       | 31         | 1                                     | 10,663          |
| Layer 6         | 13,985           | 2,345   | 335                       | 2,060             | 4                | 1,956                           | 7,285                   | 28                                          | 0                                          | 7,257        | 22         | 0                                     | 7,235           |
| Layer 7         | 5,933            | 959     | 160                       | 819               | 2                | 824                             | 3,169                   | 73                                          | 0                                          | 3,096        | 16         | 0                                     | 3,080           |
| Layer 8         | 4,859            | 745     | 166                       | 758               | 0                | 453                             | 2,737                   | 38                                          | 0                                          | 2,699        | 155        | 0                                     | 2,544           |
| Layer 9         | 5,061            | 954     | 137                       | 876               | 0                | 617                             | 2,477                   | 54                                          | 0                                          | 2,423        | 69         | 1                                     | 2,353           |
