# Supplementary material for: Phylogenetic Analysis of a Microbialite-Forming Microbial Mat from a Hypersaline Lake of the Kiritimati Atoll, Central Pacific
Source: PubMed Central journal article supplement (PMC3677903; doi:10.1371/journal.pone.0066662), 2013-06-10
Supplement: pone.0066662.s007.pdf [file pone.0066662.s007.pdf]

**Table S3.** Hydrochemical data of Lake 21 water and pore water of microbial mat layers.

| Sample               | pH             | Temperature (°C) | Redox potential (mV) |
|----------------------|----------------|------------------|----------------------|
| Lake water           | 7.948          | 31.7             | 91.4                 |
| Layer 1 <sup>a</sup> | 7.708          | 32               | -43                  |
| Layer 2 <sup>a</sup> | 7.708          | 32               | -43                  |
| Layer 3 <sup>a</sup> | 7.708          | 32               | -43                  |
| Layer 4              | 6.716          | 32               | -123                 |
| Layer 5              | 6.670          | 32               | -133                 |
| Layer 6              | 6.664          | 32               | -142                 |
| Layer 7 <sup>a</sup> | 6.661          | 32               | -135                 |
| Layer 8 <sup>a</sup> | 6.661          | 32               | -135                 |
| Layer 9              | Not determined | Not determined   | Not determined       |

<sup>a</sup>values derive from pooled porewater
