# Supplementary material for: Phylogenetic Analysis of a Microbialite-Forming Microbial Mat from a Hypersaline Lake of the Kiritimati Atoll, Central Pacific
Source: PLOS journal article supplement (doi:10.1371/journal.pone.0066662), 2013-06-10
Supplement: S2 (10.1371/journal.pone.0066662.s002) [file journal.pone.0066662.s002]

(A) V3for\_B

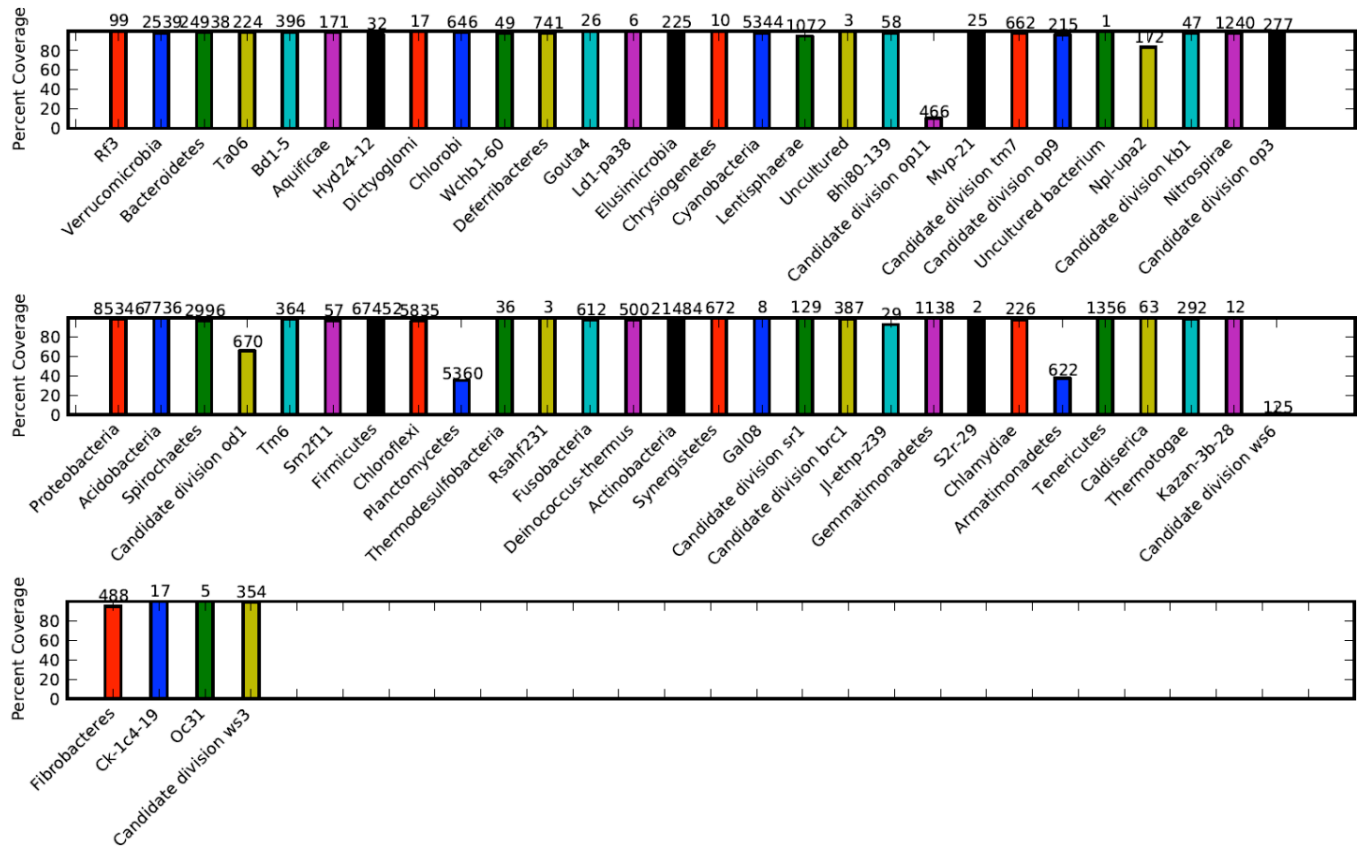

(B) V5rev\_B

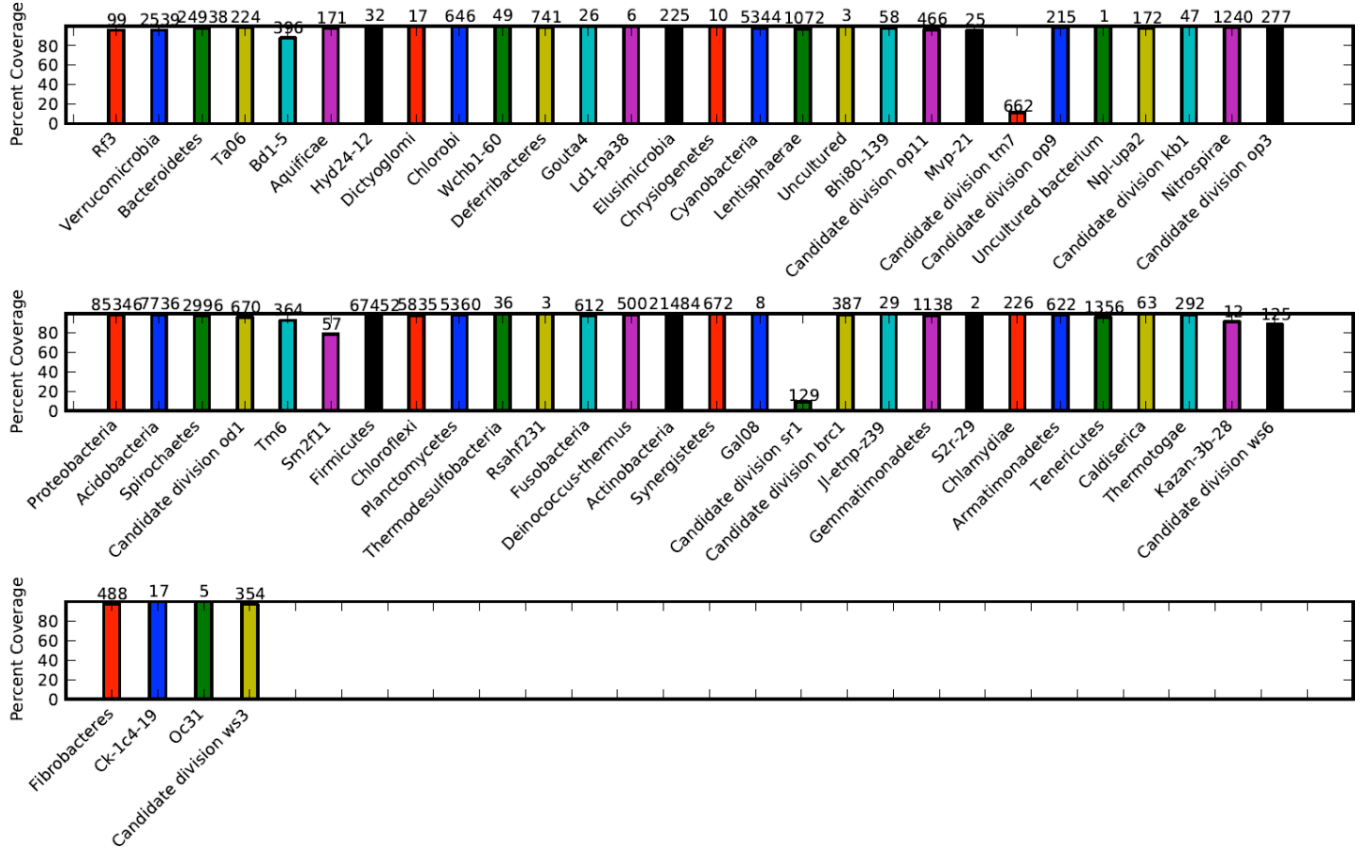

(C) V3for\_A

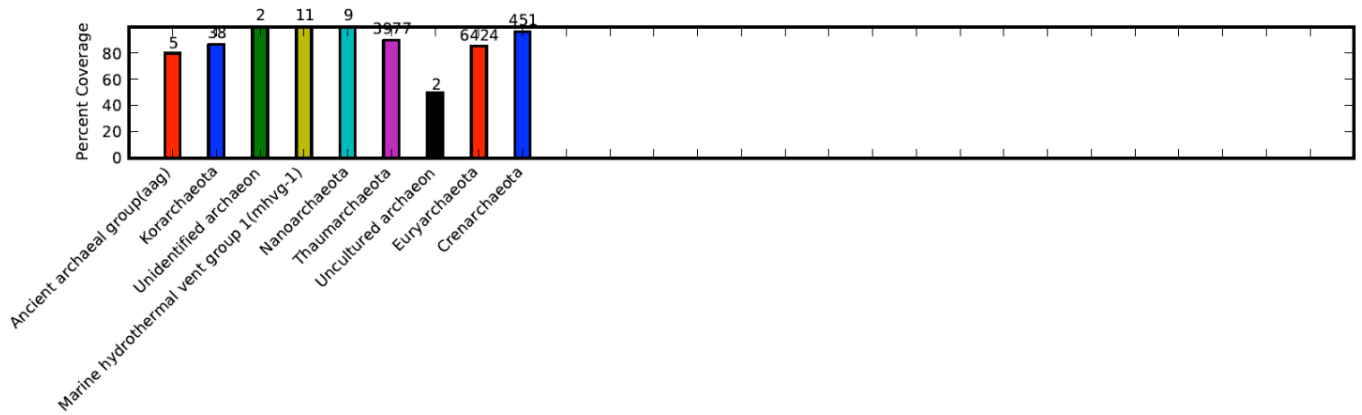

#### (D) V5rev\_A

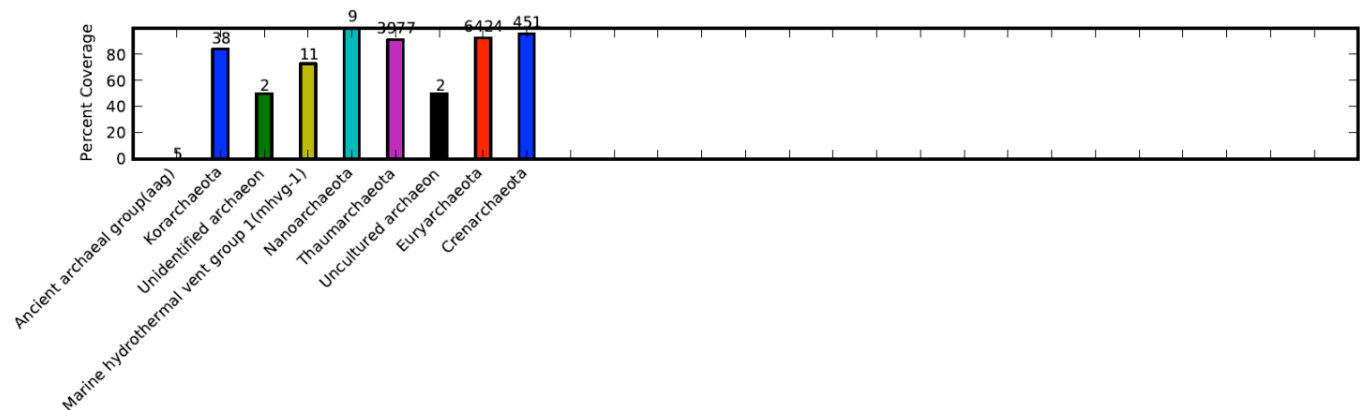

**Figure S2. Primer coverage of bacterial and archaeal phyla.** Coverage of bacterial phyla of forward (A) and reverse (B) primers and archaeal phyla of forward (C) and reverse (D) primers were determined with PrimerProspector [1]. Colored bars represent percent coverage of the primers and numbers above bars depict total sequences within the SILVA SSU database (release 111 Ref NR) for each phylum [2].

#### References

1. Walters WA, Caporaso JG, Lauber CL, Berg-Lyons D, Fierer N, et al. (2011) PrimerProspector: de novo design and taxonomic analysis of barcoded polymerase chain reaction primers. *Bioinformatics* 27: 1159-1161.
2. Pruesse E, Quast C, Knittel K, Fuchs BM, Ludwig W, et al. (2007) SILVA: a comprehensive online resource for quality checked and aligned ribosomal RNA sequence data compatible with ARB. *Nucleic Acids Res* 35: 7188-7196.
